# Supplementary material
Source: PubMed Central journal article supplement (PMC4793865)
Supplement: knog018782.ww2_default.pdf [file knog018782.ww2_default.pdf]

**Appendix 2: Supplementary figures A-F**

**Figure A: Funnel plots for cancer and death**

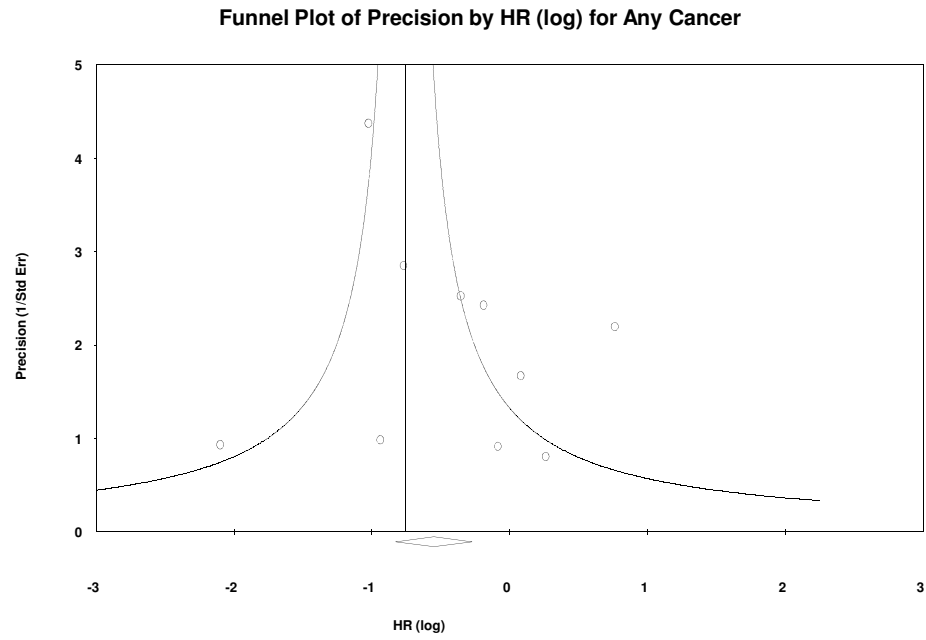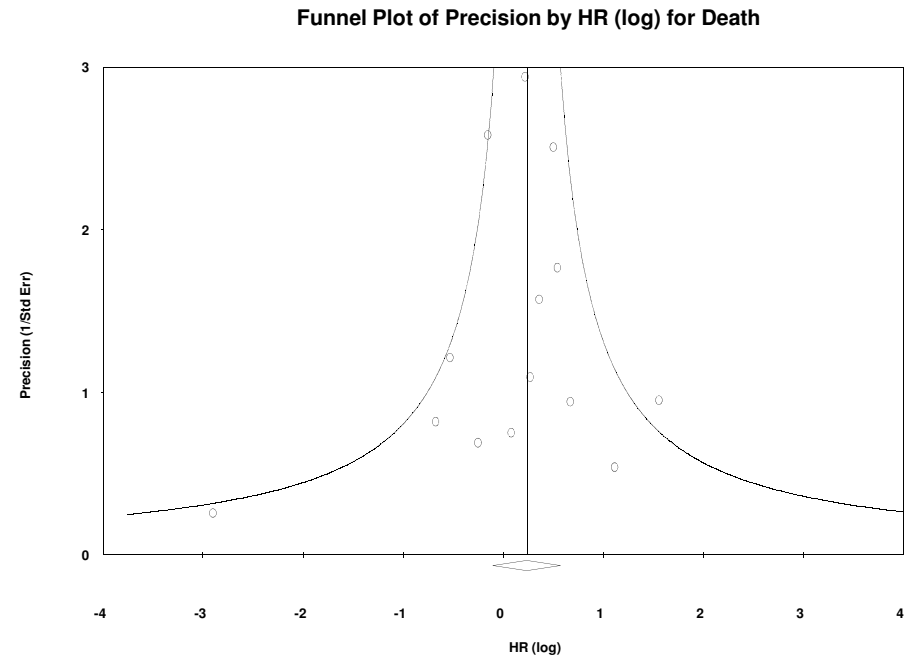

**Figure B. Time to first other cancer by treatment group\***

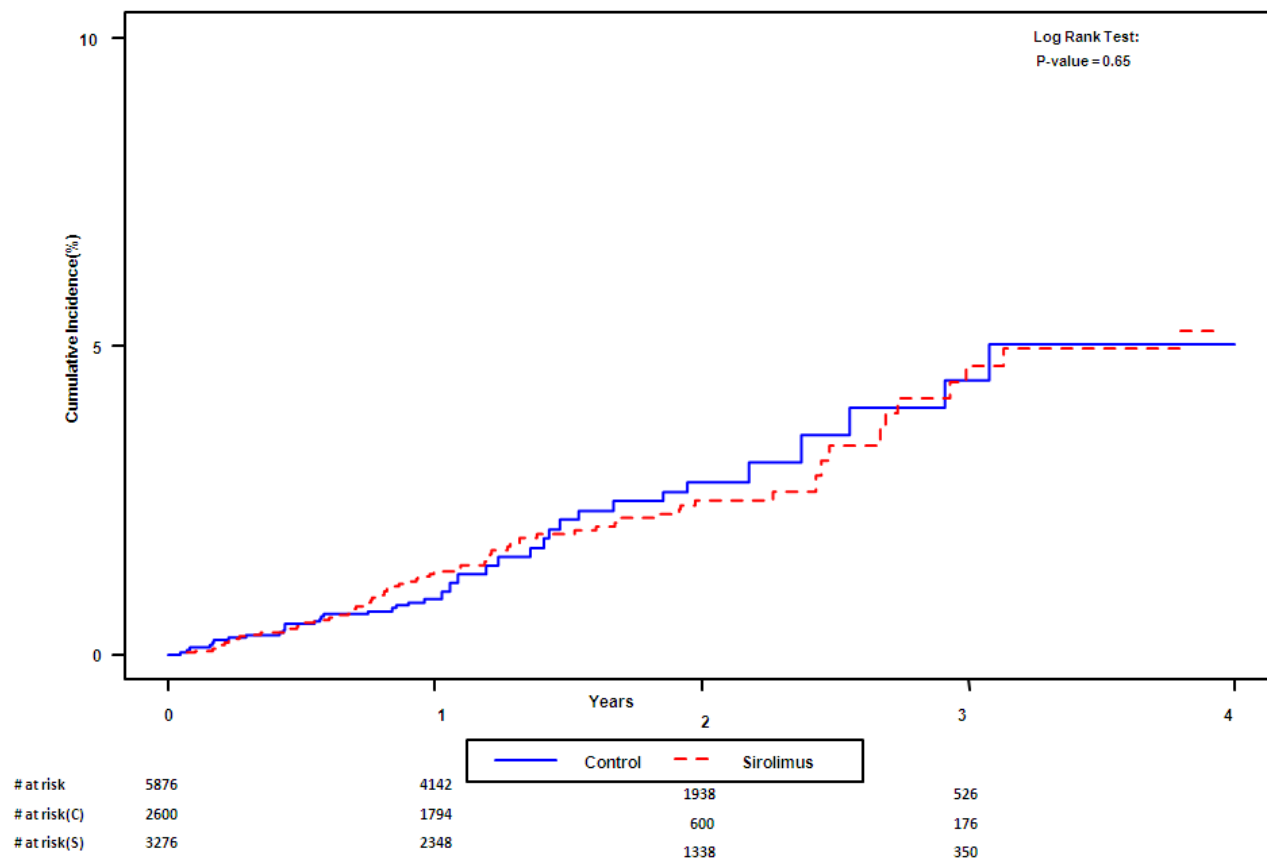

\*Includes all cancers but basal cell and squamous cell skin cancer

**Figure C: Plot of mortality grouped by de novo and conversion trial**

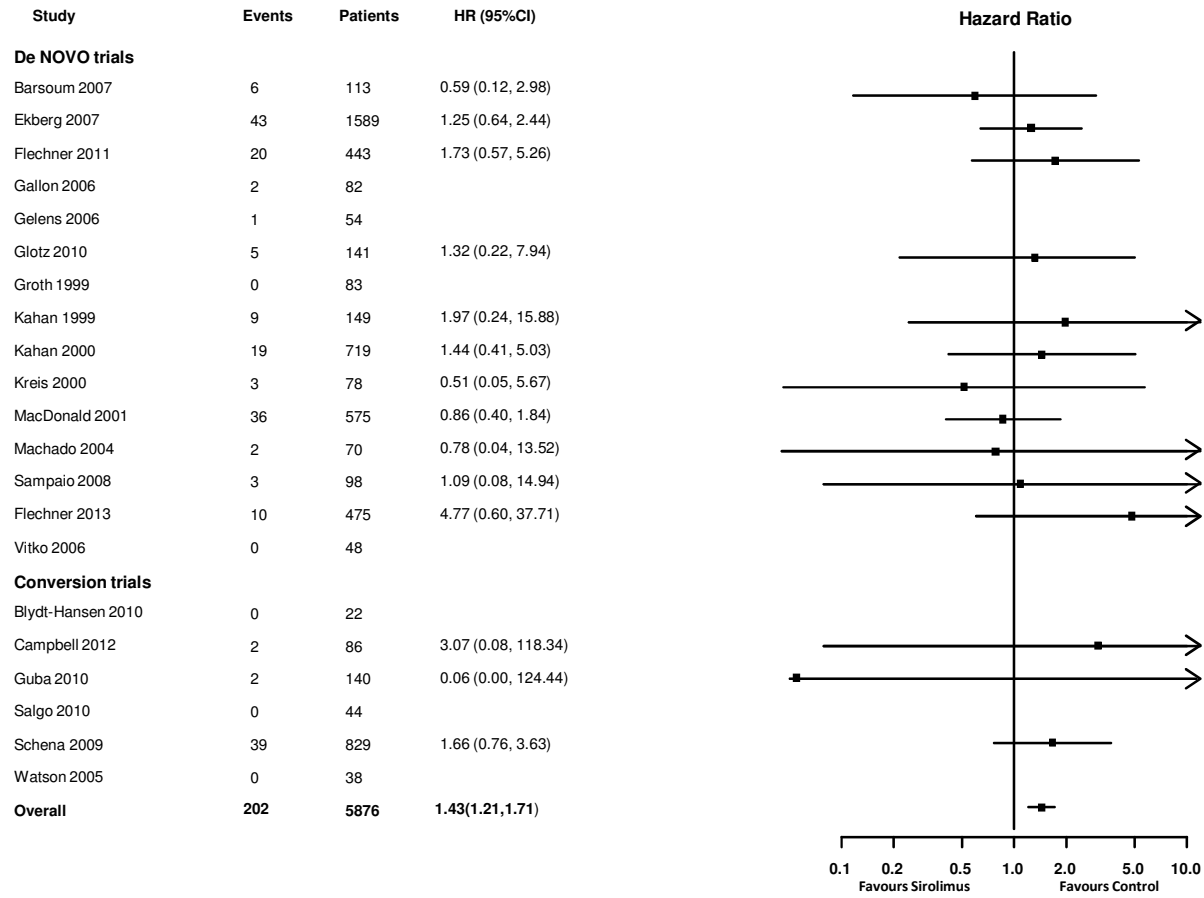

Figure D: Death-censored renal allograft survival by treatment group

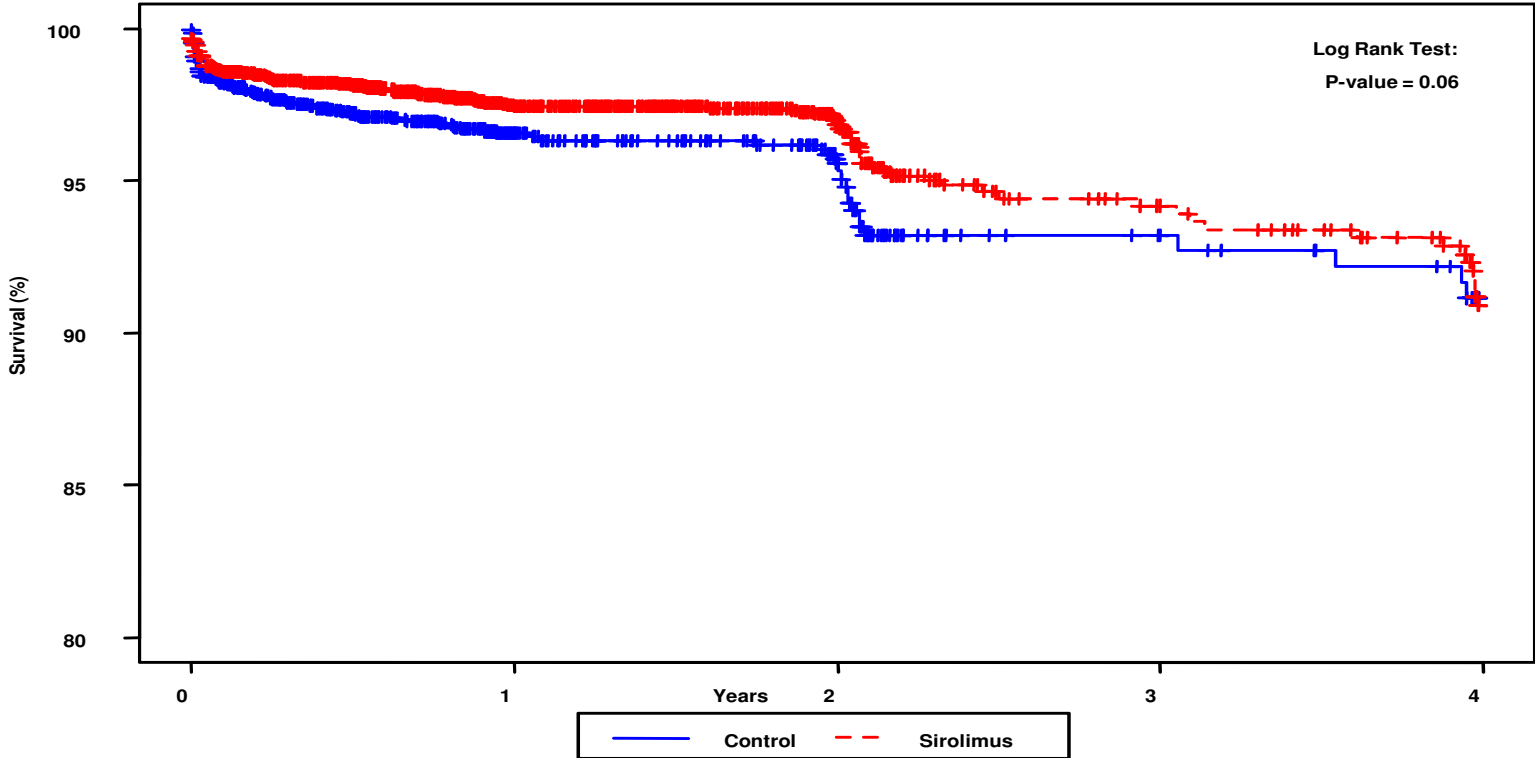

|              | 0    | 1    | 2    | 3   | 4 |
|--------------|------|------|------|-----|---|
| # at risk    | 5876 | 2576 | 1161 | 547 |   |
| # at risk(C) | 2600 | 772  | 610  | 184 |   |
| # at risk(S) | 3276 | 1804 | 1352 | 363 |   |

Figure E: Time to first malignancy for patients in conversion trials by treatment group

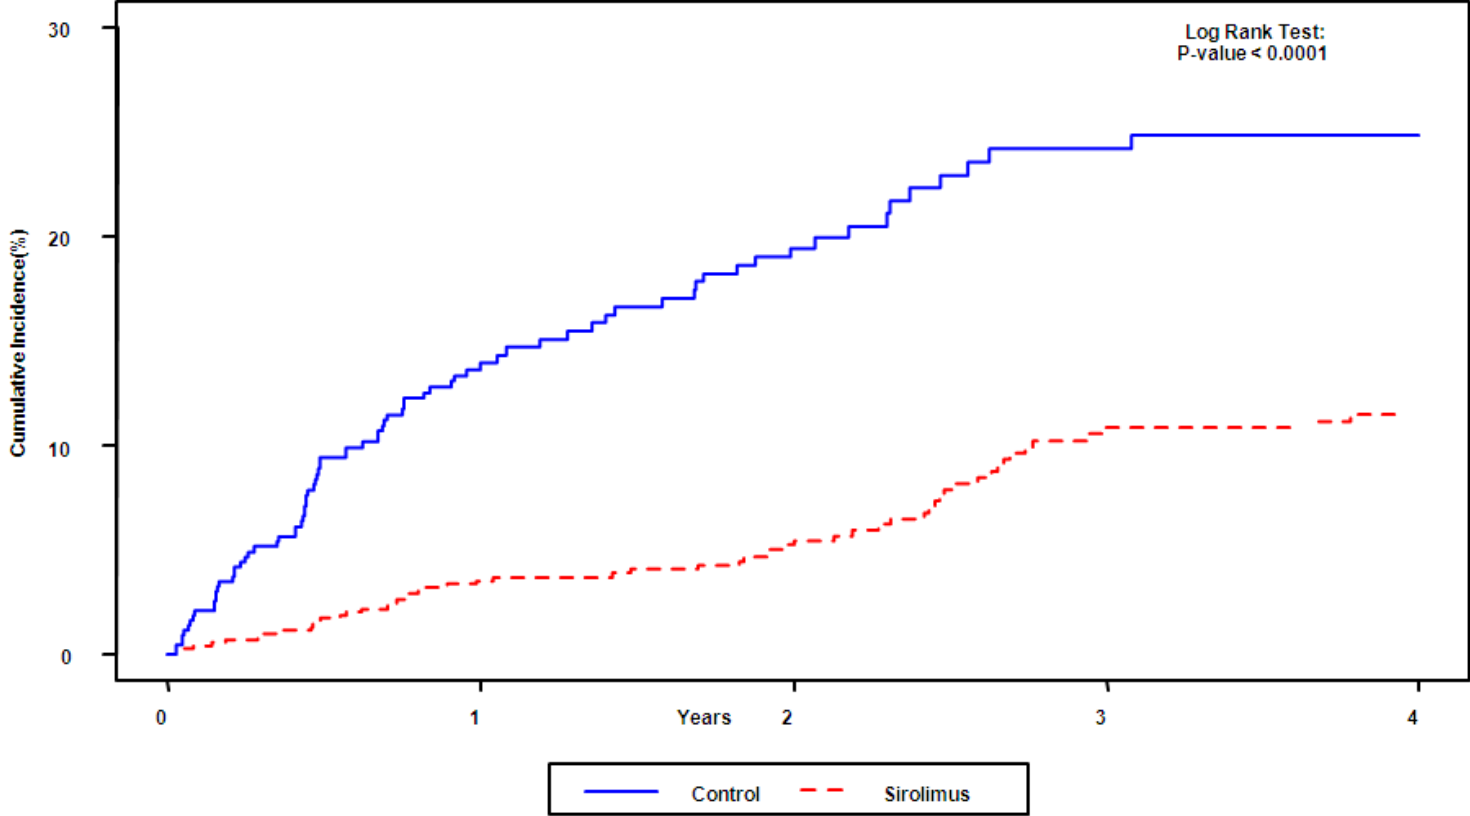

|              |      |     |     |     |
|--------------|------|-----|-----|-----|
| # at risk    | 1159 | 929 | 708 | 490 |
| # at risk(C) | 441  | 317 | 224 | 157 |
| # at risk(S) | 718  | 612 | 484 | 333 |

**Figure F: Risk of outcomes in sirolimus versus control patients – supplementary subgroup analyses\***

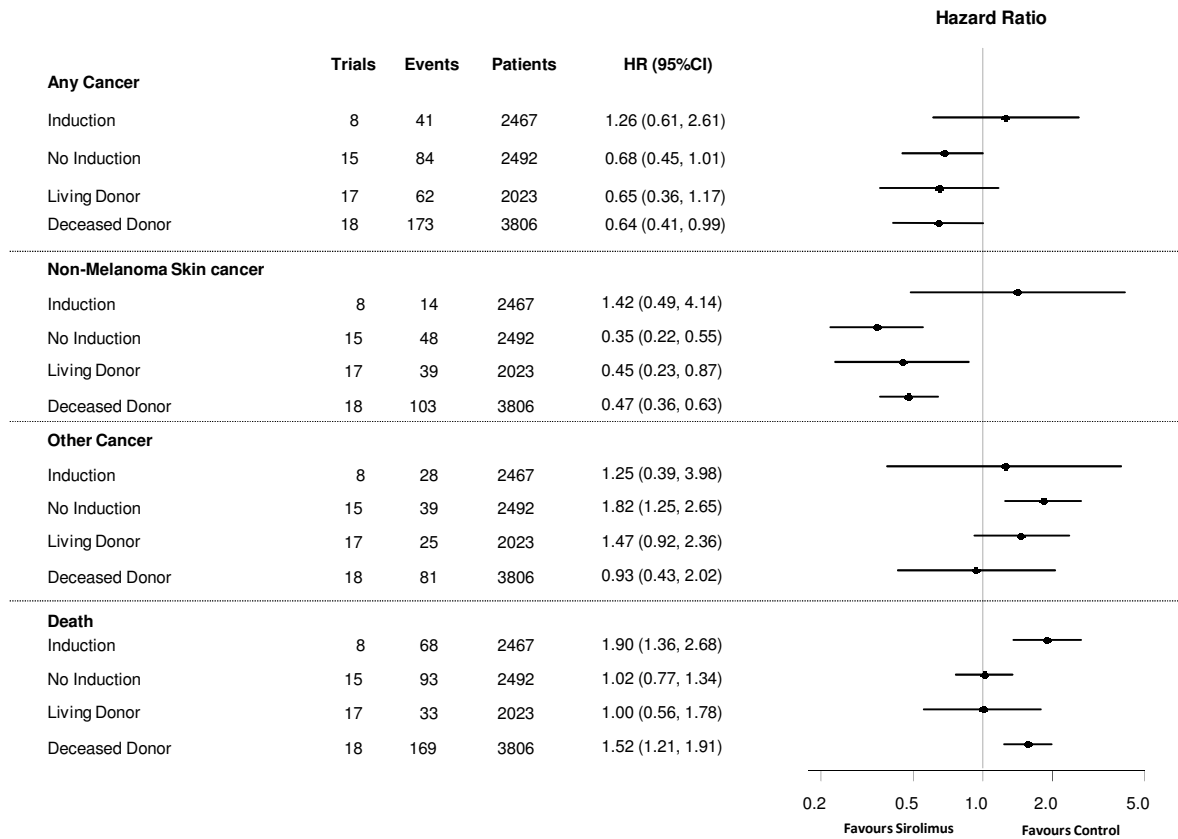

\* These analyses should be interpreted with caution as they are subgroups from trials designed to evaluate sirolimus; patients were not randomized to treatment groups based on induction/no induction or deceased/living donor and may be imbalanced for other factors associated with cancer or death. In addition, 3 trials had missing data on induction therapy and 3 trials had missing data on donor type.
